# Supplementary material for: Enhancing the thermoelectric performance of Sb2Si2Te6 by germanium doping
Source: Royal Society of Chemistry journal article supplement (doi:10.1039/d2ta05287c), 2022-01-01
Supplement: d2ta05287c1.pdf [file d2ta05287c1.pdf]

## Enhancing the thermoelectric performance of $\text{Sb}_2\text{Si}_2\text{Te}_6$ by germanium doping

Weihua Wang<sup>a,b</sup>, Xiaowei Lu<sup>a</sup>, Lin Sun<sup>a</sup>, Jipeng Luo<sup>c</sup>, Quan Shi<sup>c</sup>, Na Ta<sup>a</sup>, Peng  
Jiang<sup>\*a,c</sup>, Xinhe Bao<sup>\*a,c</sup>

<sup>a</sup> State Key Laboratory of Catalysis, CAS Center for Excellence in Nanoscience,  
Dalian Institute of Chemical Physics, Chinese Academy of Sciences, Dalian 116023,  
Liaoning, China

<sup>b</sup> University of Chinese Academy of Sciences, Beijing 100049, China

<sup>c</sup> Dalian National Laboratory for Clean Energy, Dalian Institute of Chemical Physics,  
Chinese Academy of Sciences, Dalian 116023, Liaoning, China

E-mail address: pengjiang@dicp.ac.cn (P. Jiang), xhbao@dicp.ac.cn (X. Bao).

### 1. Heat capacity $C_p$ of $\text{Sb}_2\text{Si}_{1.94}\text{Ge}_{0.06}\text{Te}_6$

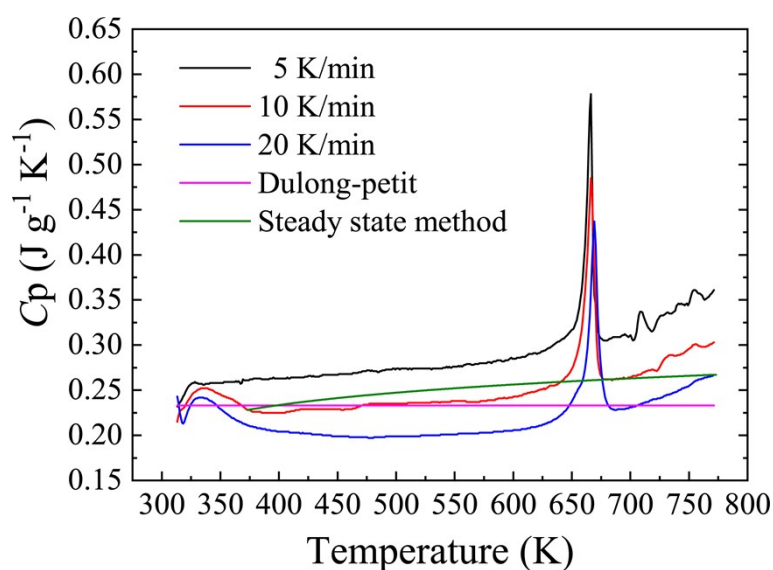

Fig. S1 Comparison of the specific heat capacity measured with different heating rates for differential scanning calorimeter (DSC), the quasi-steady state method and the Dulong-Petit theoretical value. Such comparison suggests that the heating rate of 10 K/min for DSC measurement provides the most reliable values.

## 2. In-situ X-ray diffraction

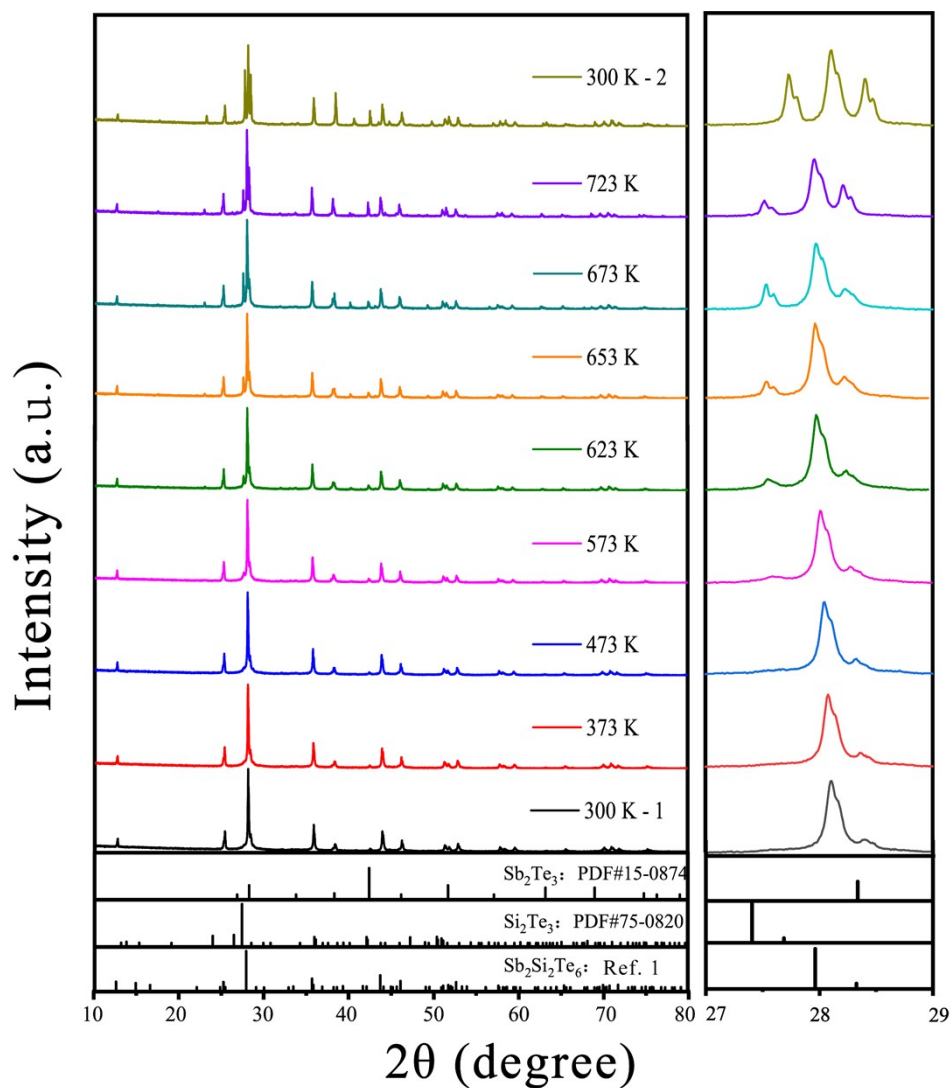

Fig. S2 In-situ X-ray diffraction patterns of the  $\text{Sb}_2\text{Si}_2\text{Te}_6$ . 300 K-1 and 300 K-2 correspond to the room-temperature results of the original sample and the sample after heating process, respectively.

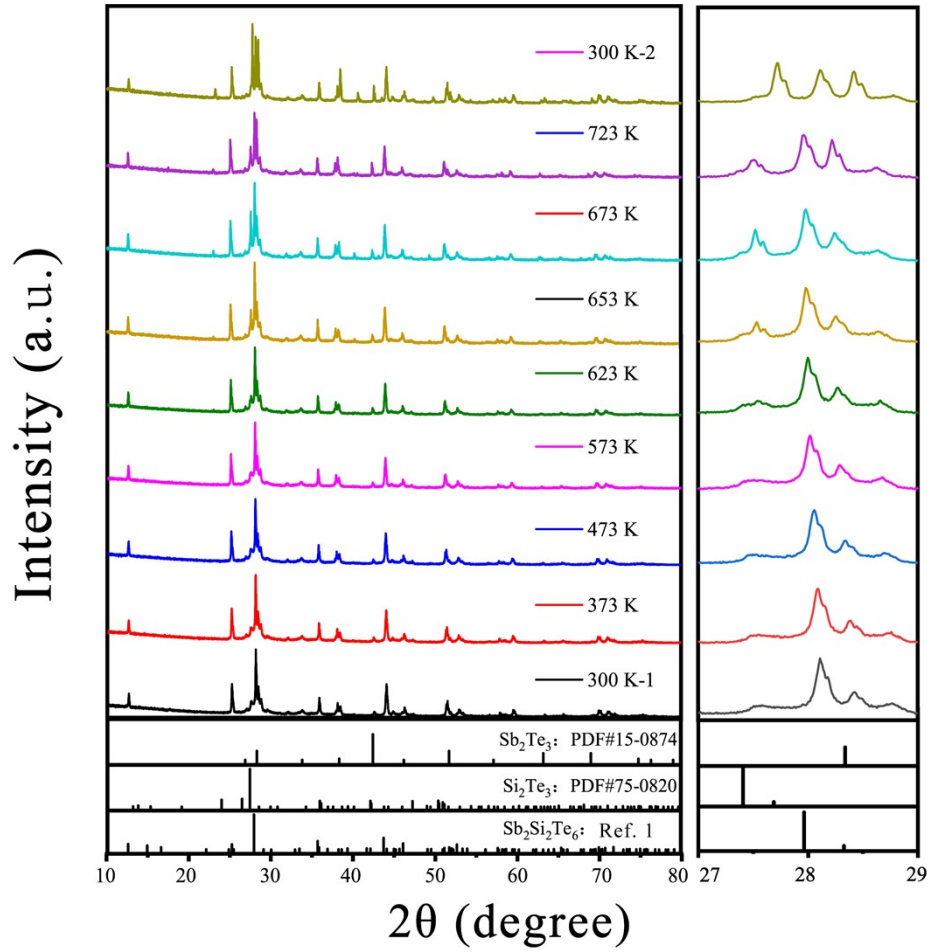

Fig. S3 In-situ X-ray diffraction patterns of the  $\text{Sb}_2\text{Si}_{1.94}\text{Ge}_{0.06}\text{Te}_6$ . 300 K-1 and 300 K-2 correspond to the room-temperature results of the original sample and the sample after heating process, respectively.

### 3. The isotropy of $\text{Sb}_2\text{Si}_{1.94}\text{Ge}_{0.06}\text{Te}_6$ thermoelectric performance

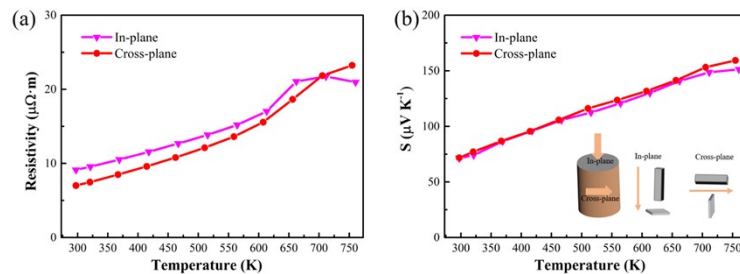

Fig. S4 Temperature-dependent (a) electrical resistivities and (b) Seebeck coefficients of  $\text{Sb}_2\text{Si}_{1.94}\text{Ge}_{0.06}\text{Te}_6$  measured along different directions.

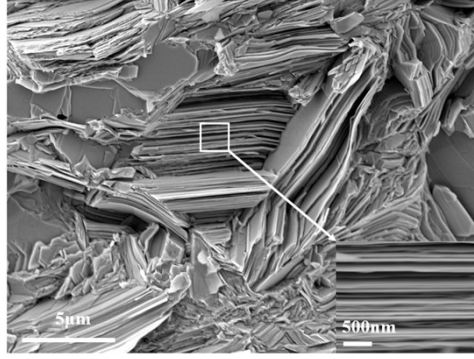

Fig. S5 The SEM images of the  $\text{Sb}_2\text{Si}_2\text{Te}_6$  sample.

#### 4. The reproducibility of experimental results

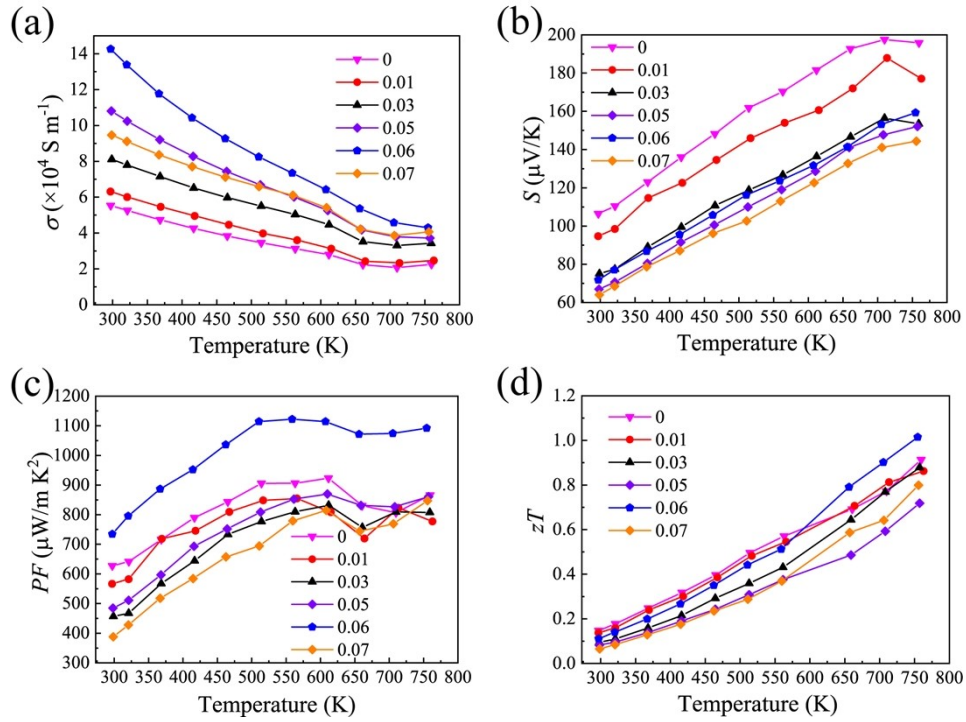

Fig. S6 Temperature dependence of thermoelectric properties of  $\text{Sb}_2\text{Si}_{2-x}\text{Ge}_x\text{Te}_6$  ( $x=0, 0.01, 0.03, 0.05, 0.06, 0.07$ ): (a) electrical resistivity, (b) Seebeck coefficient, (c) power factor, (d)  $zT$  values of  $\text{Sb}_2\text{Si}_{2-x}\text{Ge}_x\text{Te}_6$ . All samples were re-prepared using the same procedure.

#### 5. Lattice thermal conductivity

The lattice thermal conductivity  $\kappa_{lat}$  is calculated from  $\kappa_{lat} = \kappa_{tot} - \kappa_{car}$ . Here the

carrier thermal conductivity  $\kappa_{car}$  is calculated by the Wiedemann-Franz law,<sup>2,3</sup>  $\kappa_{car} = L\sigma T$ , where  $L$  is the Lorenz number. The total thermal conductivity  $\kappa_{tot}$  is obtained by the equation  $\kappa = D\rho C_p$ .

Based on the single band approximation, the Seebeck coefficient can be described by formula (S1) and (S2), and the Lorenz number  $L$  can be calculated by equation (S3).

$$S = \pm \frac{k_B}{e} \left( \frac{(r + 5/2)F_{r+3/2}(\xi)}{(r + 3/2)F_{r+1/2}(\xi)} - \xi \right) \quad \text{S1}$$

$$F_n(\xi) = \int_0^{\infty} \frac{x^n}{1 + e^{x-\xi}} dx \quad \text{S2}$$

$$L = \left( \frac{k_B}{e} \right)^2 \left( \frac{(r + 7/2)F_{r+5/2}(\xi)}{(r + 3/2)F_{r+1/2}(\xi)} - \left[ \frac{(r + 5/2)F_{r+3/2}(\xi)}{(r + 3/2)F_{r+1/2}(\xi)} \right]^2 \right) \quad \text{S3}$$

where  $F_n(\xi)$  is the  $n$ th order Fermi integration,  $\xi$  is the reduced Fermi energy,  $r$  is the scattering parameter,  $k_B$  is the Boltzmann's constant,  $x$  is the variable of integration, and  $e$  is the electron charge. Here, the acoustic phonon scattering has been assumed as the main carrier scattering mechanism,  $r = -0.5$ . By applying the calculated  $\xi$  into Equation (S3), the Lorenz number is obtained as shown in Fig. S6 (a). Combining the  $\kappa_{tot}$  in Fig. S6 (b), the  $\kappa_{lat}$  and  $\kappa_{car}$  can also be obtained (Fig. S6 (c) and Fig. S6 (d)). As shown in Fig. S6 (c) and Fig. S6 (d),  $\text{Sb}_2\text{Si}_{1.94}\text{Ge}_{0.06}\text{Te}_6$  has the lowest lattice thermal conductivity and the highest carrier thermal conductivity. The reduction of  $\kappa_{lat}$  primarily can be ascribed to the phonon scattering.

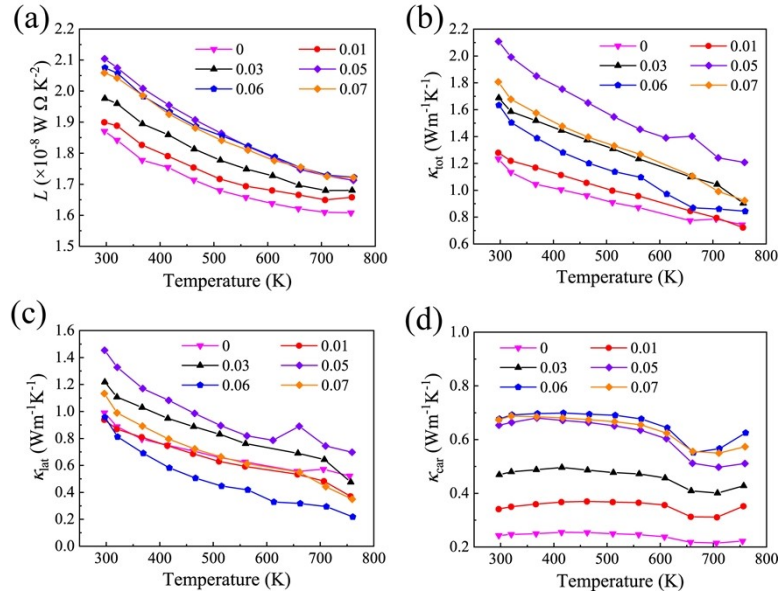

Fig. S7 Temperature-dependent (a) Lorenz constant, (b) total thermal conductivity, (c) lattice thermal conductivity, and (d) electronic thermal conductivity for  $\text{Sb}_2\text{Si}_{2-x}\text{Ge}_x\text{Te}_6$  ( $x = 0, 0.01, 0.03, 0.05, 0.06, 0.07$ ).

## 6. The thermal expansion coefficient measurement

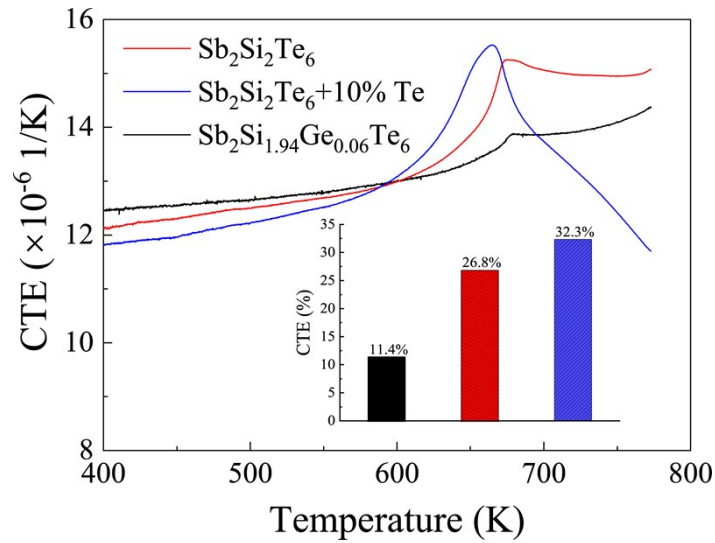

Fig. S8 The temperature dependent CTE of the  $\text{Sb}_2\text{Si}_2\text{Te}_6$ ,  $\text{Sb}_2\text{Si}_{1.94}\text{Ge}_{0.06}\text{Te}_6$  and  $\text{Sb}_2\text{Si}_2\text{Te}_6+10\text{wt}\% \text{Te}$ . The insert shows the rate of CTE change from 373 K to the phase transition temperature of three samples.

## 7. Thermal cycling stability testing

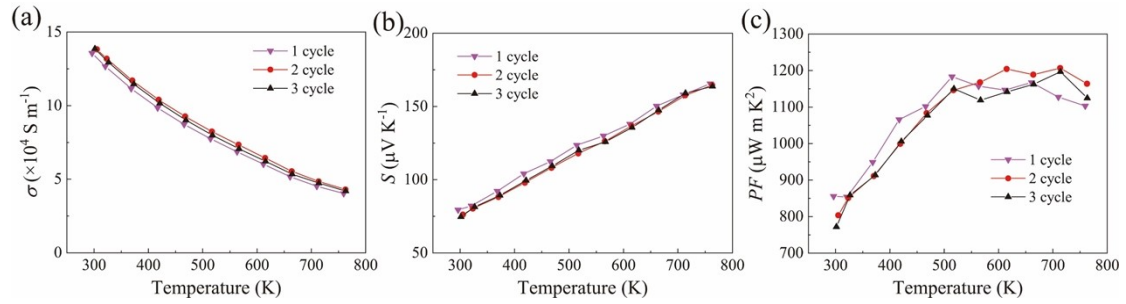

Fig. S9 The change of (a) electrical conductivity, (b) Seebeck coefficient and (c) power factor under three thermal cycles.

## 8. Three-dimensional numerical simulation model

All legs of the  $\text{Mg}_{3.2}\text{Sb}_{1.5}\text{Bi}_{0.49}\text{Te}_{0.01}$  (n type) and  $\text{Sb}_2\text{Si}_{1.94}\text{Ge}_{0.06}\text{Te}_6$  (p type) are set with the same cross-sectional area,  $4 \text{ mm} \times 4 \text{ mm}$ . The thickness of the copper electrode is 0.2 mm, and the thickness of the aluminum nitride ceramic plate is 0.5 mm.

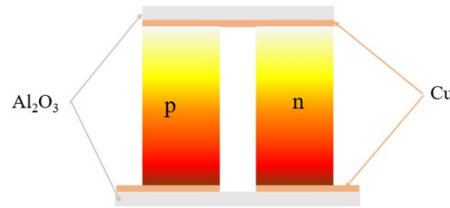

Fig. S10 Schematic diagram of the thermoelectric device.

## 9. Synthesis and properties of $\text{Mg}_{3.2}\text{Sb}_{1.5}\text{Bi}_{0.49}\text{Te}_{0.01}$

Polycrystalline  $\text{Mg}_{3.2}\text{Sb}_{1.5}\text{Bi}_{0.49}\text{Te}_{0.01}$  samples were synthesized by high-energy milling magnesium scrap (99.8%, Damao Chemical Reagent Factory), antimony shots (99.99%, Lige Science), bismuth powder (99.99%, Aladdin) and Te shot (99.999%, ZhongNuo Advanced Material). They were sealed into stainless-steel vials according to stoichiometric ratios in an argon-filled glove box. The mixture was mechanically alloyed by high-energy ball milling with a high-energy mill (SPEX 8000D) for 1 h. The processed powder was loaded into a graphite die with 12.7 mm diameter and pressed by SPS for 10 min at 673 K and for 2 min at 1073 K under an axial pressure of 50 MPa.

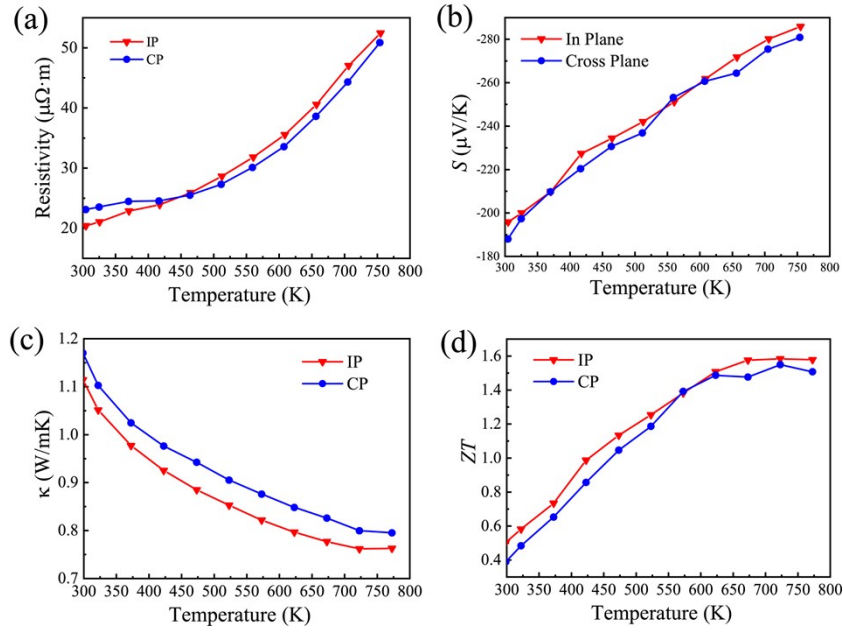

Fig. S11 The thermoelectric properties of the  $\text{Mg}_{3.2}\text{Sb}_{1.5}\text{Bi}_{0.49}\text{Te}_{0.01}$  as a function of temperature along two directions.

## 10. Mechanical properties of $\text{Sb}_2\text{Si}_{1.94}\text{Ge}_{0.06}\text{Te}_6$ and $\text{Mg}_{3.2}\text{Sb}_{1.5}\text{Bi}_{0.49}\text{Te}_{0.01}$

Table S1 The mechanical properties of  $\text{Sb}_2\text{Si}_{1.94}\text{Ge}_{0.06}\text{Te}_6$  and  $\text{Mg}_{3.2}\text{Sb}_{1.5}\text{Bi}_{0.49}\text{Te}_{0.01}$

| Materials                                                        | CTE ( $\times 10^{-6} \text{ 1/K}$ ) | Compressive strength (MPa) |
|------------------------------------------------------------------|--------------------------------------|----------------------------|
| $\text{Sb}_2\text{Si}_{1.94}\text{Ge}_{0.06}\text{Te}_6$         | 12 – 14                              | 49                         |
| $\text{Mg}_{3.2}\text{Sb}_{1.5}\text{Bi}_{0.49}\text{Te}_{0.01}$ | 17.6 – 19.9                          | 158                        |

## 11. Geometrical optimization of the thermoelectric device



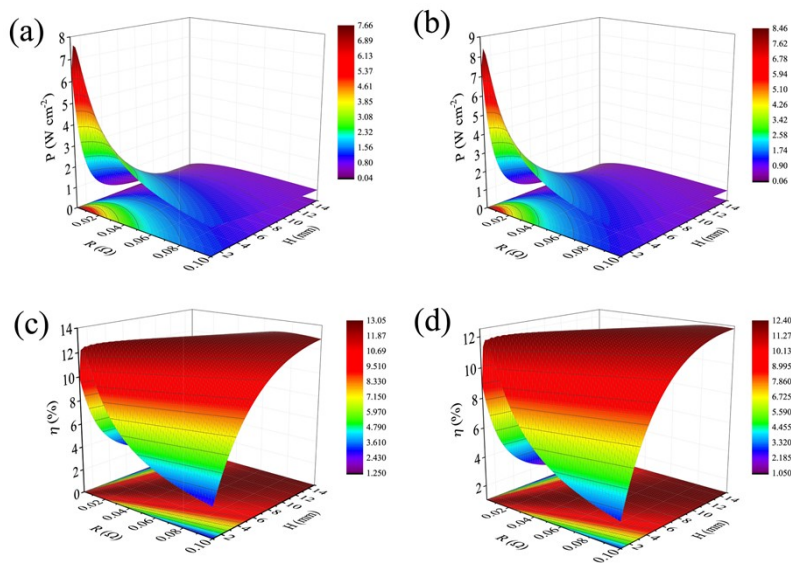

Fig. S12 The output power density (a and b) and the energy conversion efficiency (c and d) of the single pair thermoelectric module as a function of the height  $H$  of the p-type and n-type thermoelectric materials and the load resistance. The thermoelectric module is composed of n-type  $\text{Mg}_{3.2}\text{Sb}_{1.5}\text{Bi}_{0.49}\text{Te}_{0.01}$  and p-type  $\text{Sb}_2\text{Si}_2\text{Te}_6$  in (b) and (d) or  $\text{Sb}_2\text{Si}_{1.94}\text{Ge}_{0.06}\text{Te}_6$  in (a) and (c). The thermoelectric performance of  $\text{Sb}_2\text{Si}_2\text{Te}_6$  is from the literature.<sup>1</sup>

## References

- 1 Y. B. Luo, S. T. Cai, S. Q. Hao, F. Pielhofer, I. Hadar, Z. Z. Luo, J. W. Xu, C. Wolverton, V. P. Dravid, A. Pfitzner, Q. Y. Yan and M. G. Kanatzidis, *Joule*, 2020, **4**, 159–175.
- 2 W. S. Liu, Q. Y. Zhang, Y. C. Lan, S. Chen, X. Yan, Q. Zhang, H. Wang, D. Z. Wang, G. Chen, and Z. F. Ren, *Adv. Energy Mater.*, 2011, **1**, 577–587.
- 3 L. H. Huang, Q. Y. Zhang, Y. M. Wang, R. He, J. Shuai, J. J. Zhang, C. Wang, and Z. F. Ren, *Phys. Chem. Chem. Phys.*, 2017, **19**, 25683–25690.
